# Supplementary material
Source: MDPI journal article supplement (https://www.mdpi.com/2073-4441/15/14/2647)
Supplement: s1 [file s1]

## Supplementary Material

Table S1. Biometric features (length, width, height) and weight of *Anodonta cygnea* collected from aquaculture (T0) and exposed in three different rivers for short term and long term.

| Exposure time         | ID sample | Shell length (cm) | Shell width (cm) | Shell height (cm) | Wet soft tissue weight (g) | Wet gills weight (g) | Wet gastrointestinal tract weight (g) |
|-----------------------|-----------|-------------------|------------------|-------------------|----------------------------|----------------------|---------------------------------------|
| T0                    | Ctr1      | 9.36              | 6.44             | 2.8               | 10.8                       | 1.3                  | 1.6                                   |
|                       | Ctr2      | 8.12              | 5.73             | 2.5               | 8.5                        | 1.4                  | 1.5                                   |
|                       | Ctr3      | 7.08              | 5.55             | 3                 | 9.3                        | 3.2                  | 2.4                                   |
| Short term<br>1 month | Ani1      | 9.37              | 6.53             | 3.3               | 22                         | 5.7                  | 8                                     |
|                       | Ani2      | 9.9               | 7.33             | 3.5               | 27.8                       | 11                   | 4.2                                   |
|                       | Mar 1     | 9.23              | 6.35             | 3.5               | 21.4                       | 3.2                  | 7.4                                   |
|                       | Mar 2     | 8.69              | 6.98             | 3.5               | 17.9                       | 2.2                  | 5.7                                   |
|                       | Sac1      | 9.57              | 6.94             | 3.5               | 45.6                       | 11.2                 | 13.3                                  |
|                       | Sac2      | 10.13             | 7.66             | 4.5               | 48.1                       | 7.1                  | 13.7                                  |
| Long term<br>3 months | Ani3      | 8.62              | 6.58             | 3.5               | 32.7                       | 8.9                  | 10.2                                  |
|                       | Ani4      | 8.58              | 6.72             | 3.2               | 34.92                      | 5.32                 | 16                                    |
|                       | Ani5      | 7.89              | 6.23             | 3                 | 15.3                       | 2.6                  | 3.4                                   |
|                       | Mar 3     | 9.29              | 6.75             | 3.5               | 22.6                       | 9                    | 3.4                                   |
|                       | Mar 4     | 9.17              | 6.75             | 3.5               | 23.6                       | 8.8                  | 4.7                                   |
|                       | Mar 5     | 9.1               | 6.6              | 3.5               | 22                         | 8.5                  | 3                                     |
|                       | Sac3      | 8.61              | 6.63             | 3.5               | 16.6                       | 3.3                  | 1.5                                   |
|                       | Sac4      | 11.14             | 7.76             | 4                 | 39.6                       | 12.6                 | 13.5                                  |
|                       | Sac5      | 10.55             | 7.68             | 4                 | 38.5                       | 9.4                  | 11.9                                  |
| Average               |           | 9.13              | 6.73             | 3.43              | 25.40                      | 6.37                 | 6.97                                  |
| Dev. St.              |           | 0.96              | 0.61             | 0.46              | 12.10                      | 3.68                 | 4.92                                  |

Table S2. Physicochemical parameters of river water at the three sampling sites.

| River  | Sampling site                 | Temperature (°C) | Dissolved oxygen (mg/L) | pH   | Conductivity (µs/cm) |
|--------|-------------------------------|------------------|-------------------------|------|----------------------|
| Aniene | 41°56'00.7"N,<br>12°32'41.3"E | 23               | 6.39                    | 7.79 | 1284                 |
| Marta  | 42°14'38.8"N,<br>11°42'41.4"E | 25.1             | 7.5                     | 7.89 | 720                  |
| Sacco  | 41°42'56.7"N,<br>13°05'08.7"E | 25.8             | 6.85                    | 7.68 | 588                  |

Table S3. List of reference libraries employed for the analysis via MicroFTIR, software PARTICLE WIZARDS, Omnic™ Picta™.

---

Synthetic fibers by Microscope  
 Plastic Fibers  
 Polymer additives and plasticizers  
 HR Polymer additive and plasticizers  
 HR Hummel Polymer and plasticizers  
 HR Nicolet Sampler Library  
 HR Sprouse Polymer additives  
 HR rubber compounding materials

---

Equations S1. Equations employed to obtain the total number of SMPs per gills or GITs and the weight of particles per specimen.

The total number of SMPs per set of gills or per gastrointestinal tract was then calculated according to equation 1 (from Corami et al., 2020a):

$$N_{tot} g^{-1} = \frac{(n*F)}{w} \quad (1)$$

where n = microplastics counted on every field, w = wet weight (expressed in grams) of gills or gastrointestinal tract analyzed, and F = count factor, calculated as follows (equation 2):

$$F = \frac{Filter\ area}{(Count\ field\ area*n\ count\ fields)} \quad (2)$$

Then, the weight of microplastics ( $\mu g$ ) per organism is calculated according to equation 3, (from Corami et al., 2020a):

$$\mu g_{SMPs} g^{-1} = \frac{W_{SMPs}}{w} \quad (3)$$

where  $w_{SMPs}$ =total weight of small microplastics,  $\mu g$ , and w =wet weight (expressed in grams) of gills or hepatopancreas analyzed. The weight of each microplastic items is calculated according to its volume (V) and its density ( $\rho$ ). The volume of each item is calculated according to the aspect ratio (elongation ratio). Volumes of items are then calculated according to their geometrical shape (i.e. sphere, ellipse, and cylinder).

Table S4. List of the polymers identified and quantified in the specimens of *A. cygnea* exposed in 3 different rivers for short term and long term, including T0. For each polymer the abbreviation and average density ( $g\ cm^{-3}$ ) are reported.

| Polymer                                       | Abbreviation              | Density |
|-----------------------------------------------|---------------------------|---------|
| Acrylic Polymer                               | ACRYLIC POLYMER           | 1.19    |
| Aramide                                       | ARAMIDE                   | 1.46    |
| Brominated Polystyrene                        | BROMINATED PS             | 1.18    |
| Epoxy resin mixture                           | EPOXY RESIN MIXTURE       | 1.2     |
| Ethylene Methyl Acrylate Copolymer            | EMA                       | 0.96    |
| Ethylene Vinyl Acetate                        | EVA                       | 0.94    |
| Modacrylic                                    | MODACRYLIC                | 1.35    |
| Nitrile-Butadiene Rubber                      | NBR                       | 1       |
| Polyamide 6                                   | PA-6                      | 1.14    |
| Polyarylamide                                 | PARA                      | 1.51    |
| Polyester                                     | PES                       | 1.38    |
| Polyethylene acrylic acid copolymer-Zinc salt | PEEA-Zn                   | 0.95    |
| Polyolefin                                    | PO                        | 0.95    |
| Polyphthalamide                               | PPA                       | 1.11    |
| Polypropylene                                 | PP                        | 0.905   |
| Polytetrafluoroethylene                       | PTFE                      | 2.2     |
| Styrene-Butadiene Rubber                      | SBR                       | 1.04    |
| Synthetic urethane Rubber                     | SYNTHETIC URETHANE RUBBER | 1.21    |

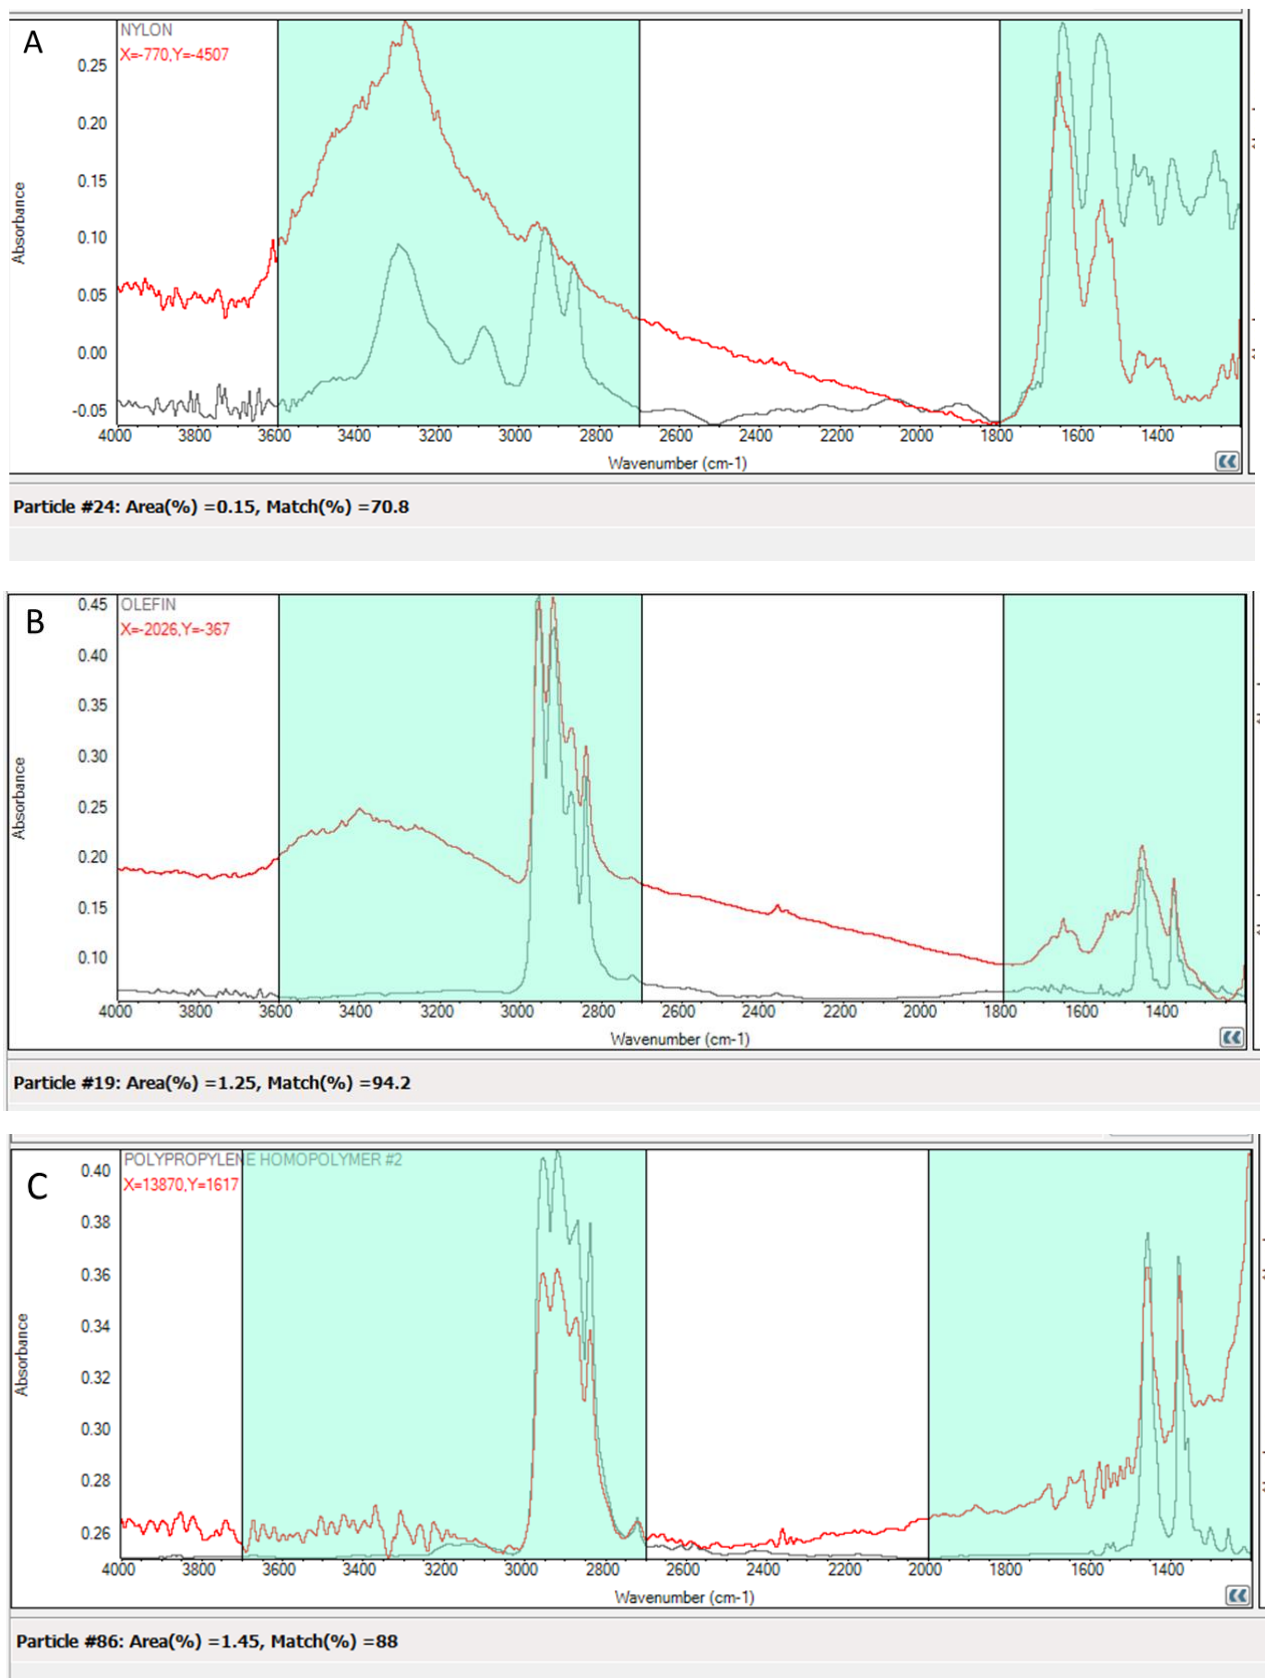

Figure S1. Some examples of the best FTIR spectra of polymers collected on the SMPs observed in gills and GITs of *Anodonta cygnea*. (A) Nylon or polyamide (PA), (B) polyolefin (PO) and (C) polyaryamide polypropilene (PP). The FTIR spectrum of the polymer collected is in red, the spectrum of the polymer present in the suite of reference libraries employed is in black. Spectral range of 4000–1200 cm<sup>-1</sup>, 100-mm step size scanning (spatial resolution) at 100–100 mm aperture, and 32 co-added scans at the spectral resolution of 4 cm<sup>-1</sup>. Optimal Match % of polymers was  $\geq 65\%$ .

Table S5. Microplastic particles size measured in  $\mu\text{m}$  as length (L, the longest dimension) and width (W, perpendicular to the length) found in gills and GITs.

|       |                       | T0        |           | Aniene ST |           | Aniene LT |           | Marta ST  |           | Marta LT  |           | Sacco ST  |           | Sacco LT  |           |
|-------|-----------------------|-----------|-----------|-----------|-----------|-----------|-----------|-----------|-----------|-----------|-----------|-----------|-----------|-----------|-----------|
|       |                       | L         | W         | L         | W         | L         | W         | L         | W         | L         | W         | L         | W         | L         | W         |
| Gills | Mean                  | 62.5<br>4 | 25.1<br>3 | 48.4<br>3 | 24.5<br>5 | 53.2<br>7 | 26.5      | 45.0<br>5 | 25.1<br>9 | 59.5<br>5 | 32.4<br>8 | 43.2<br>3 | 21.1<br>3 | 56.7<br>5 | 30.9      |
|       | SD                    | 5.2       | 0.68      | 1.22      | 0.49      | 2.15      | 0.95      | 2.89      | 1.53      | 5.59      | 3.62      | 0.44      | 0.2       | 4.4       | 2.8       |
|       | Dimensional<br>range{ | 23.7      | 14        | 25.9      | 80.3      | 25.6      | 17.1      | 27.3      | 13.7      | 30.1      | 18.4      | 25.4      | 12.1      | 31.1      | 14.9      |
|       |                       | 500       | 66.6<br>2 | 200       | 80.3      | 116.<br>2 | 59.6      | 94.6      | 46.2      | 121.<br>2 | 72.7      | 107.<br>9 | 52.3      | 183.<br>7 | 122.<br>1 |
| GITs  | Mean                  | 58.9<br>7 | 29.1<br>4 | 57.0<br>2 | 30.5      | 52.8<br>8 | 26.9<br>4 | 70.2<br>9 | 35.8<br>9 | 61.9<br>2 | 30.1<br>3 | 48        | 26.7<br>5 | 59.6      | 34.3      |
|       | SD                    | 7.33      | 3.07      | 2.43      | 1.25      | 0.94      | 0.48      | 7.01      | 3.63      | 1.54      | 0.78      | 6.61      | 4.88      | 2.44      | 1.26      |
|       | Dimensional<br>range{ | 26        | 17.6      | 26.5      | 17.5      | 26.8      | 13.5      | 27.5      | 13.7      | 28        | 13        | 5         | 5         | 27.5      | 16.6      |
|       |                       | 229.<br>8 | 97.9      | 114.<br>1 | 72        | 200.<br>7 | 127.<br>8 | 187.<br>3 | 93.9      | 221.<br>1 | 118.<br>7 | 105.<br>2 | 69.6      | 117       | 64.5      |

Table S6. List of the additives, plasticizers, and other micro-litter components identified and quantified in the specimens of *A. cygnea* exposed in 3 different rivers for short term and long term, including T0. For each additive, the abbreviation and average density ( $\text{g cm}^{-3}$ ) are reported.

| Additive                                                 | Abbreviation                                | Density |
|----------------------------------------------------------|---------------------------------------------|---------|
| 50% active glycerol monostearate in polyethylene carrier | GMS                                         | 0.97    |
| Benzotriazole                                            | BTA                                         | 1.36    |
| Bromodichlorometahne                                     | CHBrCl <sub>2</sub>                         | 1.98    |
| Butyl vinyl ether                                        | NBVE                                        | 0.78    |
| Calcium pelargonate                                      | CALCIUM PELARGONATE                         | 0.900   |
| Calcium stearate                                         | CS                                          | 1.08    |
| Calcium sulfate dihydrate                                | CALCIUM SULFATE DIHYDRATE                   | 2.22    |
| Chloroalkyl phosphate ester                              | CPE                                         | 0.98    |
| Cocoamidoproyl betaine                                   | CAPB                                        | 1.05    |
| Dodecenylsuccinic anhydride                              | DDSA                                        | 1.01    |
| Hombitan TiO <sub>2</sub>                                | HOMBITAN TI02                               | 0.6     |
| Magnesium hydroxide                                      | Mg(OH) <sub>2</sub>                         | 2.34    |
| Methyl alkyl imidazoline sodium salt                     | METHYL ALKYL IMIDAZOLINE SODIUM SALT        | 1.03    |
| Methyl chloride                                          | Methyl chloride                             | 0.997   |
| N-(2-ethoxyphenyl)-n-(2-ethylphenyl)-ethanediamide       | NNE                                         | 1.2     |
| Nichel-dibuthyldithiocarbamate                           | NDBC-O                                      | 1.3     |
| Octadecanoic acid, calcium salt                          | OC SALT                                     | 0.941   |
| Octenylsuccinic anhydride succinic                       | OCTENYLSUCCINIC ANHYDRIDE SUCCINIC          | 0.866   |
| O-nitrobiphenyl                                          | O-NITROBIPHENYL                             | 1.44    |
| Pentabromodiphenyl oxide                                 | PENTABROMODIPHENYL OXIDE                    | 2.27    |
| Phosphate ester fatty acids blend                        | FAPE                                        | 1.15    |
| Poly(N-methyl acrylamide)                                | PNMA                                        | 1.322   |
| Polyether, quaternary ammonium salt mixture              | POLYETHER, QUATERNARY AMMONIUM SALT MIXTURE | 1.3     |
| Polyvinylpyrrolidone                                     | PVP                                         | 1.2     |
| Propyl zithate                                           | ZP-2-YMDT                                   | 3.5     |

|                                                               |                      |       |
|---------------------------------------------------------------|----------------------|-------|
| Propylene carbonate                                           | PC                   | 1.2   |
| Propylene glycol monostearate                                 | PGMS                 | 0.88  |
| Rayon                                                         | RAYON                | 1.51  |
| Reoflam dmmp                                                  | REOFLAM DMMP         | 1.145 |
| Silk                                                          | SILK                 | 1.3   |
| Sodium polyacrylate, polyacrylic water                        | ACR                  | 1.22  |
| Stearamidopropyldimethyl-<br>hydroxyethylammonium-dihydrogen  | DIHYDROGEN PHOSPHATE | 0.874 |
| Triphenyl methane 4,4',4''- triisocyanate in ethyl<br>acetate | FT172229             | 1.014 |
| Varox 231 xl                                                  | VAROX                | 0.877 |

---
